# Supplementary material
Source: publisher figshare collection journal article supplement (https://acs.figshare.com/ndownloader/files/9319426)
Supplement: Supplementary file 1 [file 9319426]

## Supplemental Materials

# Shielding of Enzyme by Stable and Protective Organosilica Layer on Monolithic Scaffolds for Continuous Bioconversion

*Jiafu Shi<sup>a,c,d</sup>, Yu Tian<sup>a,d</sup>, Hua Liu<sup>b</sup>, Dong Yang<sup>a,b,c</sup>, Shaohua Zhang<sup>b,c</sup>, Yizhou Wu<sup>b,c</sup>,  
Zhongyi Jiang<sup>b,c,\*</sup>*

<sup>a</sup> Tianjin Engineering Center of Biomass-derived Gas and Oil, School of Environmental Science and Engineering, Tianjin University, Tianjin 300072, China

<sup>b</sup> Key Laboratory for Green Chemical Technology of Ministry of Education, Key Laboratory of Bioengineering of Ministry of Education, School of Chemical Engineering and Technology, Tianjin University, Tianjin 300072, China

<sup>c</sup> Collaborative Innovation Center of Chemical Science and Engineering (Tianjin), Tianjin, 300072, China

<sup>d</sup> Key Laboratory of Biomass-based Oil and Gas (Tianjin University), China Petroleum and Chemical Industry Federation, Tianjin 300072, China

\* Corresponding author: Zhongyi Jiang, [zhyjiang@tju.edu.cn](mailto:zhyjiang@tju.edu.cn)

**KEYWORDS:** Monolithic scaffolds; Organosilica; Stable and protective layer; Enzyme immobilization; Penicillin G acylase

**Table S1.** Enzyme activity recovery of PGA@PDA/CH-OSi prepared with different organosilane polycondensation time and curing time.

| Curing time | Polymerization time |        |        |
|-------------|---------------------|--------|--------|
|             | 4.5 h               | 9.5 h  | 15 h   |
| 12 h        | 93.08%              | 66.69% | 45.31% |
| 24 h        | 88.90%              | 66.70% | 61.15% |

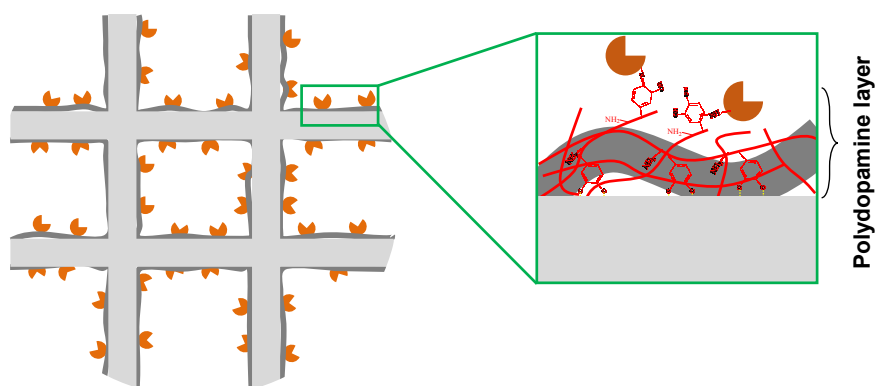

**Figure S1.** Surface chemical structure of PGA@PDA/Cordierite-H.

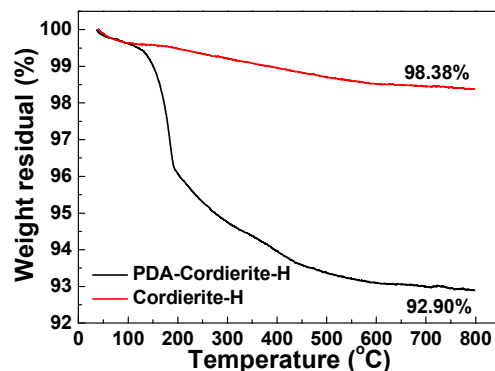

**Figure S2.** Thermogravimetric curves of Cordierite-H and PDA-Cordierite-H.

The thermogravimetric analysis of Cordierite-H and PDA-Cordierite-H was conducted. As shown in **Figure S2**, the contents of inorganic compound in Cordierite-H and PDA-Cordierite-H were, respectively, 98.38% and 92.90%. Then, the content of polydopamine ( $W_{\text{PDA-in-PDA-Cordierite-H}}$ ) in PDA-Cordierite-H was calculated to be 5.57% based on the following equation:

$$W_{\text{PDA-in-PDA-Cordierite-H}} = 1 - W_{\text{Inorganic-in-PDA-Cordierite-H}} / W_{\text{Inorganic-in-Cordierite-H}}$$

Where  $W_{\text{Inorganic-in-Cordierite-H}}$  and  $W_{\text{Inorganic-in-PDA-Cordierite-H}}$  were the contents of inorganic compound in Cordierite-H and PDA-Cordierite-H, respectively.

In our experiment, one piece of Cordierite-H (~1706.6 mg) was added in dopamine solution (2 mg mL<sup>-1</sup>, 60 mL tris-HCl buffer) for surface modification/functionalization. The mass ratio of (dopamine) to (dopamine plus Cordierite-H) was about 6.57% that was higher than  $W_{\text{PDA-in-PDA-Cordierite-H}}$ , which indicated some dopamine or polydopamine was still in solution without adhering onto the Cordierite-H.
